# Supplementary material for: Aza-BODIPY encapsulated polymeric nanoparticles as an effective nanodelivery system for photodynamic cancer treatment
Source: Royal Society of Chemistry journal article supplement (doi:10.1039/d0qm00891e), 2021-01-01
Supplement: d0qm00891e1.pdf [file d0qm00891e1.pdf]

## Supporting Information

### Aza-BODIPY encapsulated polymeric nanoparticles as effective nanodelivery system for photodynamic cancer treatment

Jongjit Treekoon<sup>a</sup>, Kantapat Chansaenpak<sup>b\*</sup>, Gamolwan Tumcharern<sup>b</sup>, Zurain Syahira Zalman Zain<sup>c</sup>, Hong Boon Lee<sup>d</sup>, Chin Siang Kue<sup>c\*</sup>, Anyanee Kamkaew<sup>a\*</sup>

<sup>a</sup> School of Chemistry, Institute of Science, Suranaree University of Technology, Nakhon Ratchasima 30000, Thailand

<sup>b</sup> National Nanotechnology Center, National Science and Technology Development Agency, Thailand Science Park, Pathum Thani, Thailand 12120

<sup>c</sup> Faculty of Health and Life Sciences, Management and Science University, Seksyen 13, 40100 Shah Alam, Selangor, Malaysia

<sup>d</sup> School of Biosciences, Faculty of Health and Medical Sciences, Taylor's University, 47500 Subang Jaya, Selangor, Malaysia

|                                                                                                                                                                | Page |
|----------------------------------------------------------------------------------------------------------------------------------------------------------------|------|
| <sup>1</sup> H and <sup>13</sup> C Nuclear Magnetic resonance (NMR) spectra.....                                                                               | 2    |
| Mass spectrometry results.....                                                                                                                                 | 4    |
| Absorption and emission of <b>AZB-I</b> in water.....                                                                                                          | 4    |
| Intensity, number, and volume-based DLS distribution results.....                                                                                              | 5    |
| Stability test and <i>In vitro</i> dye-releasing profile of <b>AZB-I@PEG-<i>b</i>-PCL</b> NPs.....                                                             | 6    |
| Singlet oxygen generation of <b>AZB-I@PEG-<i>b</i>-PCL</b> NPs.....                                                                                            | 8    |
| Colocalization study of <b>AZB-I@PEG-<i>b</i>-PCL</b> NPs with Lyso- and MitoTrackers.....                                                                     | 8    |
| Biocompatibility of <b>AZB-I@PEG-<i>b</i>-PCL</b> with normal cells.....                                                                                       | 9    |
| Body weight changes of <b>AZB-I@PEG-<i>b</i>-PCL</b> at 160 mg/kg.....                                                                                         | 10   |
| <b>Table S2.</b> The formulations and the obtained DLS sizes of <b>AZB-I@PEG-<i>b</i>-PCL</b> compared with those of other aza-BODIPY-based nanoparticles..... | 11   |
| References.....                                                                                                                                                | 12   |

# 1. $^1\text{H}$ and $^{13}\text{C}$ Nuclear Magnetic resonance (NMR) spectra

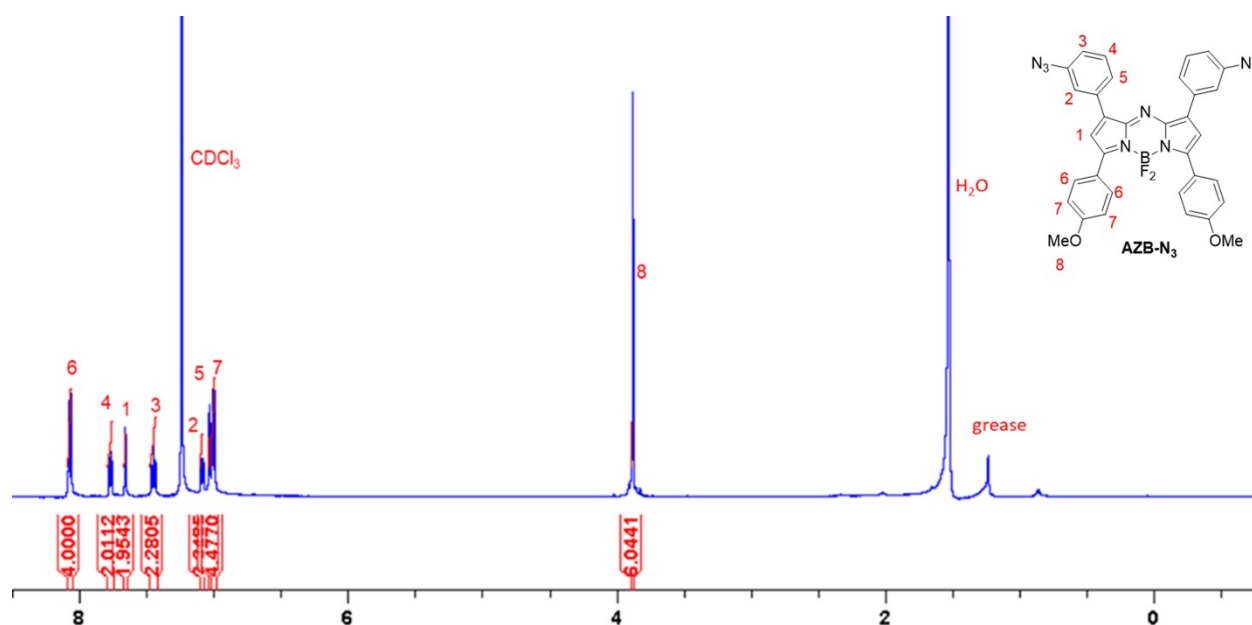

Figure S1.  $^1\text{H}$  NMR spectrum of AZB- $\text{N}_3$ .

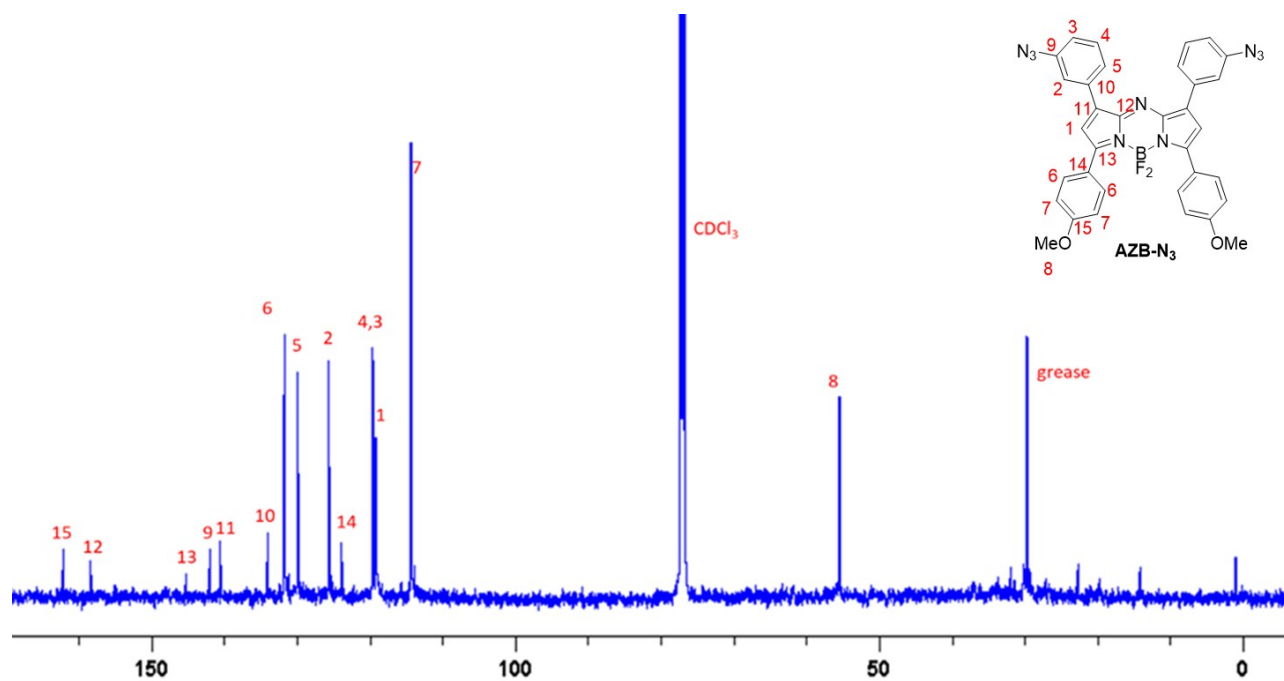

Figure S2.  $^{13}\text{C}$  NMR spectrum of AZB- $\text{N}_3$ .

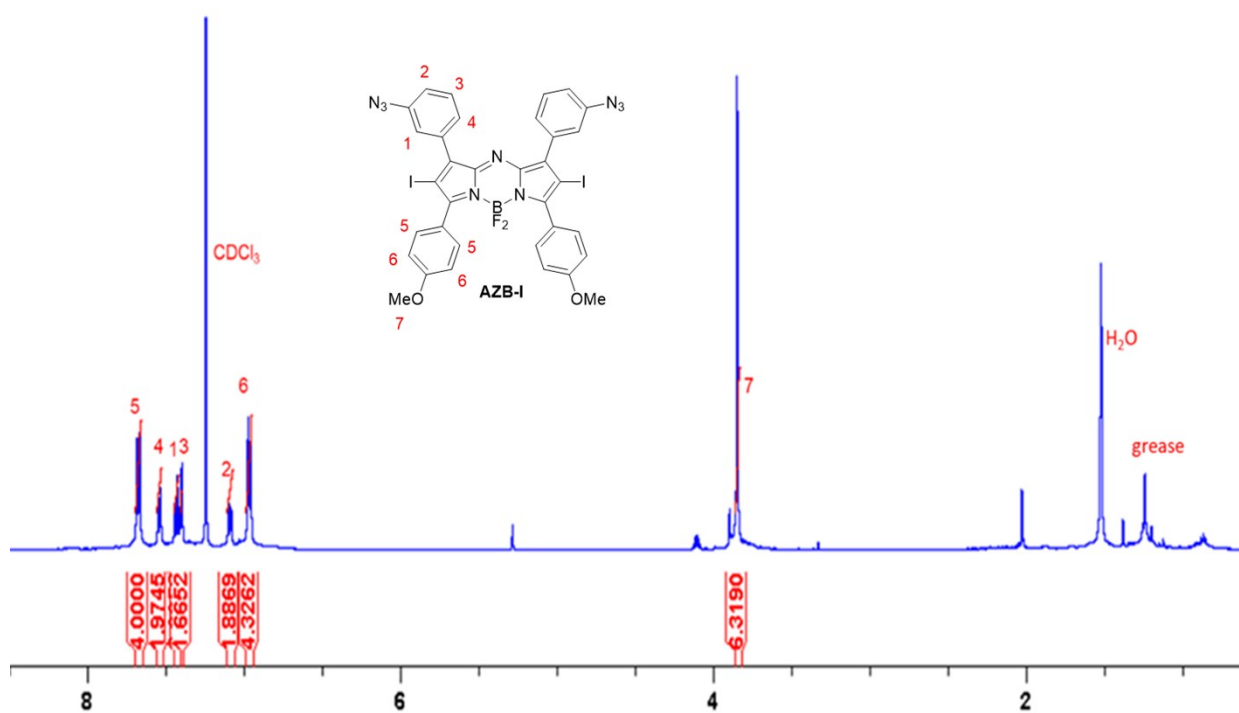

**Figure S3.** <sup>1</sup>H NMR spectrum of **AZB-I**.

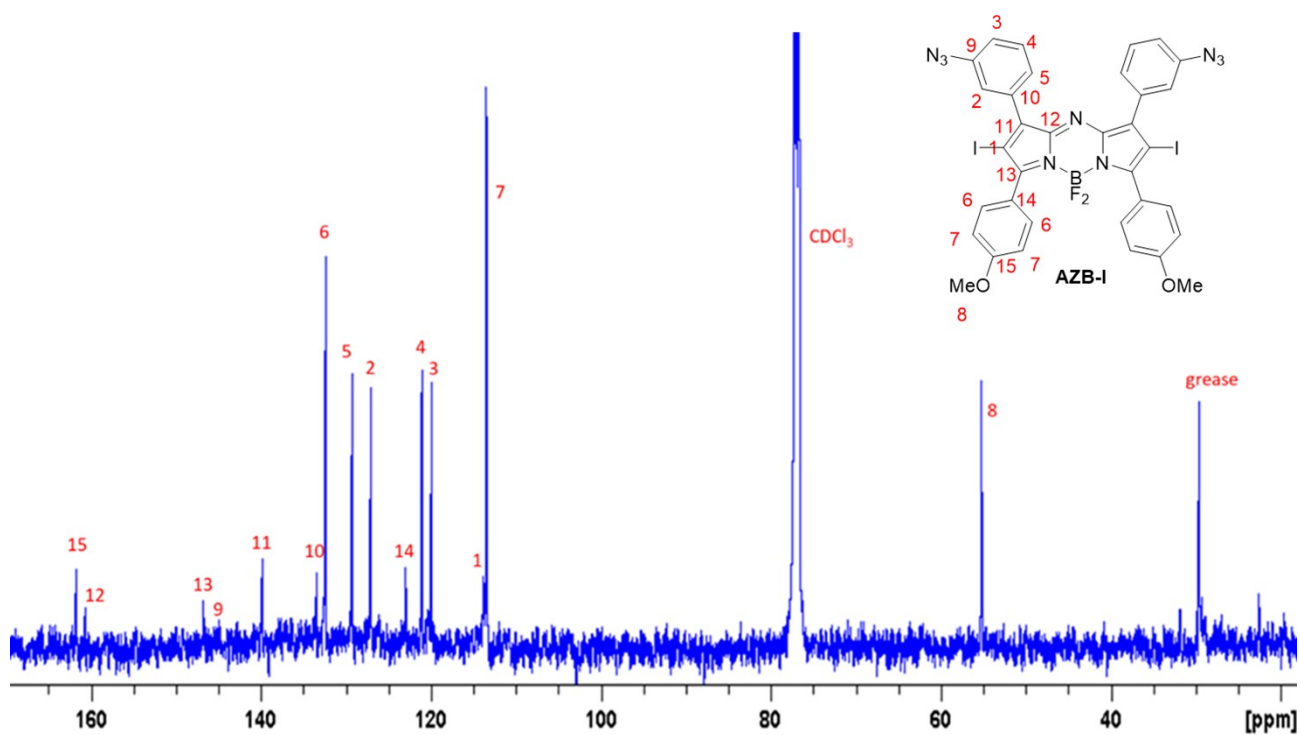

**Figure S4.** <sup>13</sup>C NMR spectrum of **AZB-I**.

## 2. Mass spectrometry results

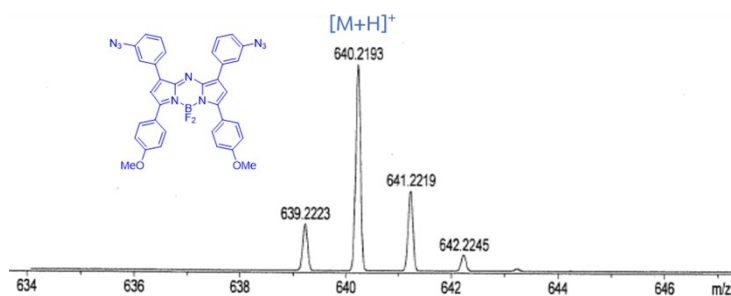

Figure S5. Mass spectrum of AZB-N<sub>3</sub>.

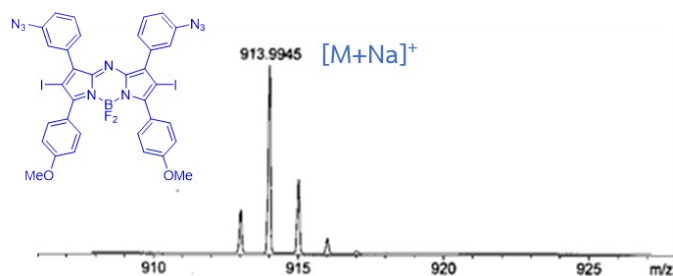

Figure S6. Mass spectrum of AZB-I.

## 3. Absorption and emission of AZB-I in water

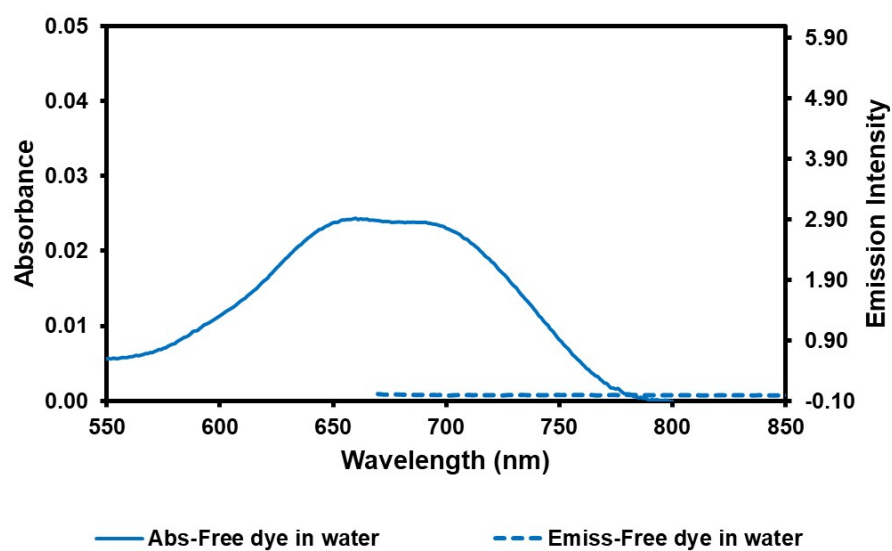

Figure S7. Absorption and emission of free dye AZB-I in water.

#### 4. Intensity, number, and volume-based DLS distribution results

**Table S1.** Average intensity, number, and volume-based DLS sizes of **AZB-I@PEG-*b*-PCL** prepared from different amount of dye feed.

| Entry <sup>a</sup> | Amount of dye feed (mg) | Average Intensity-based DLS size (nm) (n = 3) | Average Number-based DLS size (nm) (n = 3) | Average Volume-based DLS size (nm) (n = 3) | PDI (n = 3)              |
|--------------------|-------------------------|-----------------------------------------------|--------------------------------------------|--------------------------------------------|--------------------------|
| 1                  | 0.6                     | 47.2<br>( $\pm 2.0$ )                         | 29.7<br>( $\pm 1.7$ )                      | 37.3<br>( $\pm 1.5$ )                      | 0.144<br>( $\pm 0.014$ ) |
| 2                  | 0.8                     | 44.6<br>( $\pm 4.0$ )                         | 25.2<br>( $\pm 0.5$ )                      | 33.0<br>( $\pm 0.5$ )                      | 0.166<br>( $\pm 0.016$ ) |
| 3                  | 1.0                     | 46.7<br>( $\pm 1.3$ )                         | 28.3<br>( $\pm 0.6$ )                      | 35.8<br>( $\pm 0.6$ )                      | 0.170<br>( $\pm 0.010$ ) |
| 4                  | 1.2                     | 48.2<br>( $\pm 1.9$ )                         | 25.3<br>( $\pm 1.6$ )                      | 33.6<br>( $\pm 1.0$ )                      | 0.173<br>( $\pm 0.011$ ) |

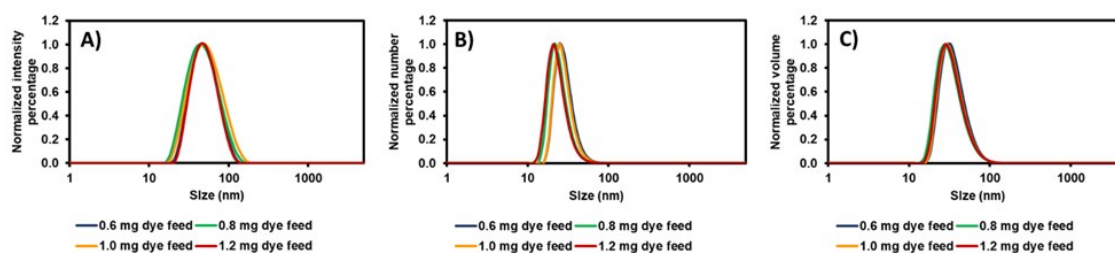

**Figure S8.** Dynamic Light Scattering (DLS) intensity-based (A), number-based (B), and volume-based size distributions.

## 5. Stability test and *In vitro* dye-releasing profile of AZB-I@PEG-*b*-PCL NPs

### Stability test

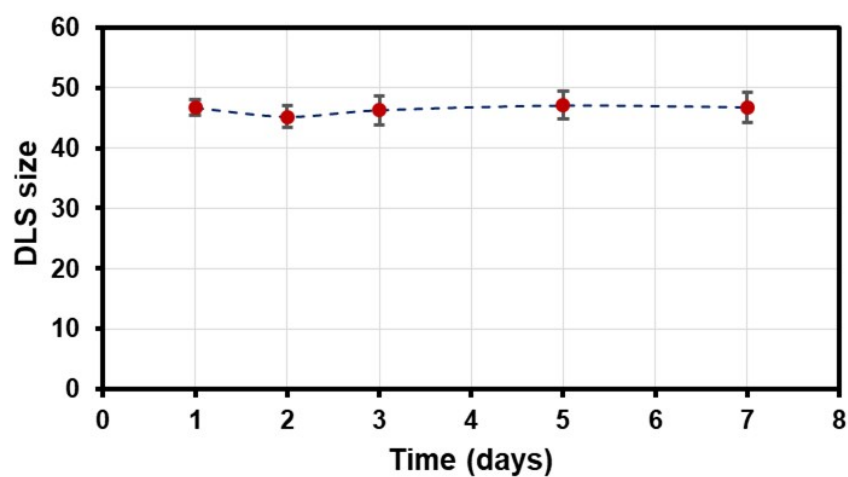

**Figure S9.** The DLS size evolution of **AZB-I@PEG-*b*-PCL** NPs (1 mg dye feed) incubated in physiological conditions (phosphate buffer solution 0.1M, pH 7.4, 37 °C) for 7 days.

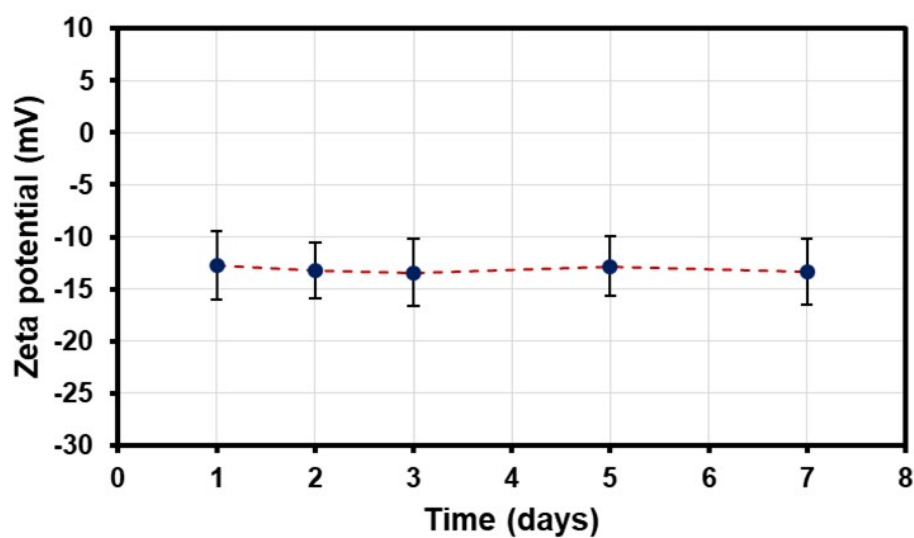

**Figure S10.** The zeta potential evolution of **AZB-I@PEG-*b*-PCL** NPs (1 mg dye feed) incubated in physiological conditions (phosphate buffer solution 0.1M, pH 7.4, 37 °C) for 7 days.

## 6. *In vitro* dye-releasing profile

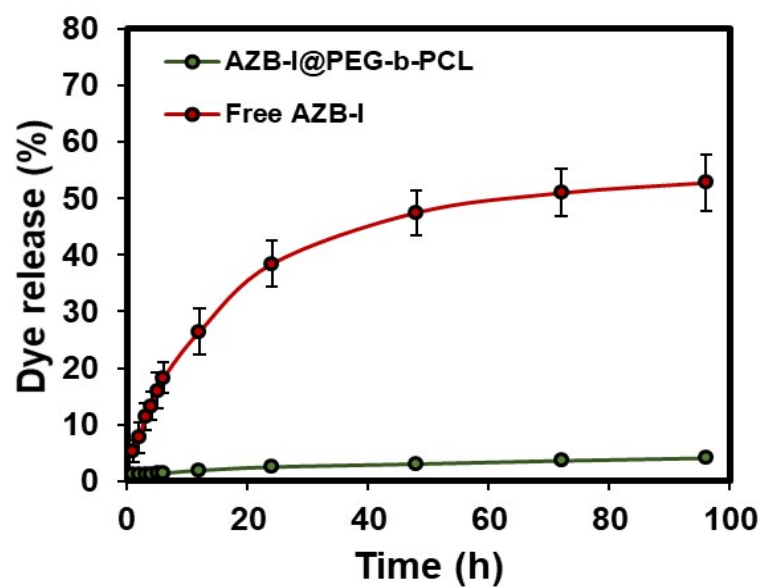

**Figure S11.** *In vitro* AZB-I release profile from AZB-I@PEG-*b*-PCL NPs. Free AZB-I release was used as control. Error bars represents mean  $\pm$  standard deviation (n= 3).

## 7. Singlet oxygen generation of AZB-I@PEG-*b*-PCL NPs

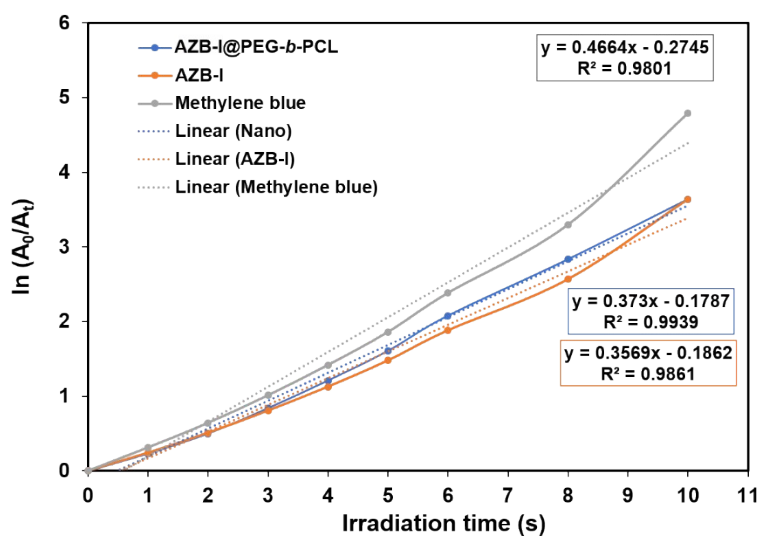

**Figure S12.** The first order kinetic plot of DPBF vs irradiation times.

## 8. Colocalization study of AZB-I@PEG-*b*-PCL NPs with Lyso- and MitoTrackers

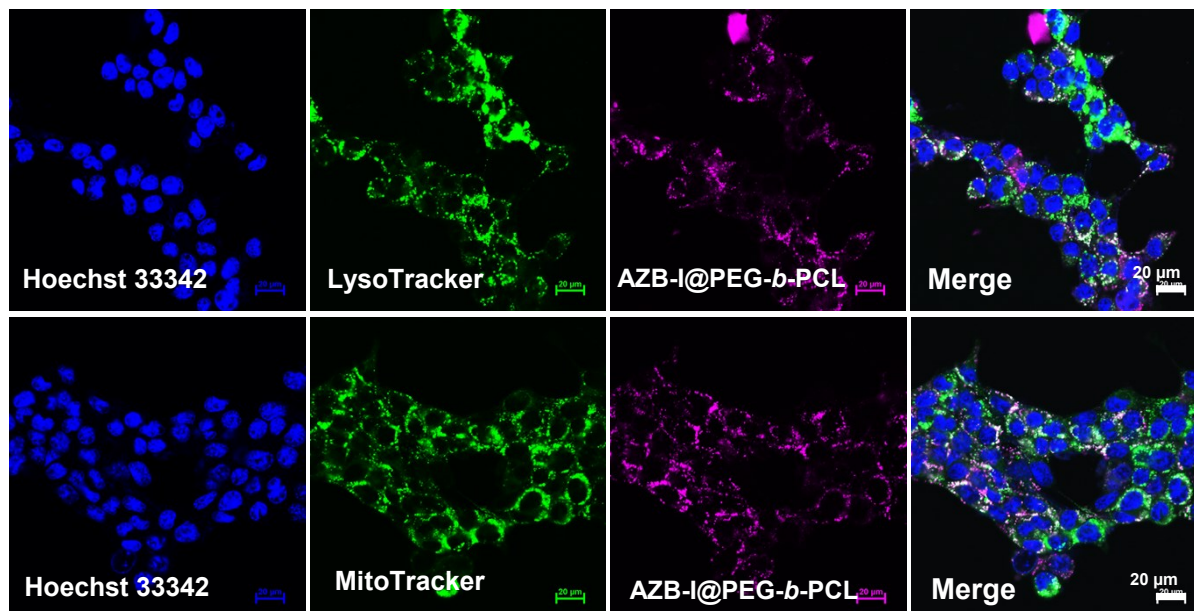

**Figure S13.** Colocalization study of AZB-I@PEG-*b*-PCL with LysoTracker (Top row) and MitoTracker (Bottom row).



## 9. Biocompatibility of **AZB-I@PEG-*b*-PCL** with normal cells

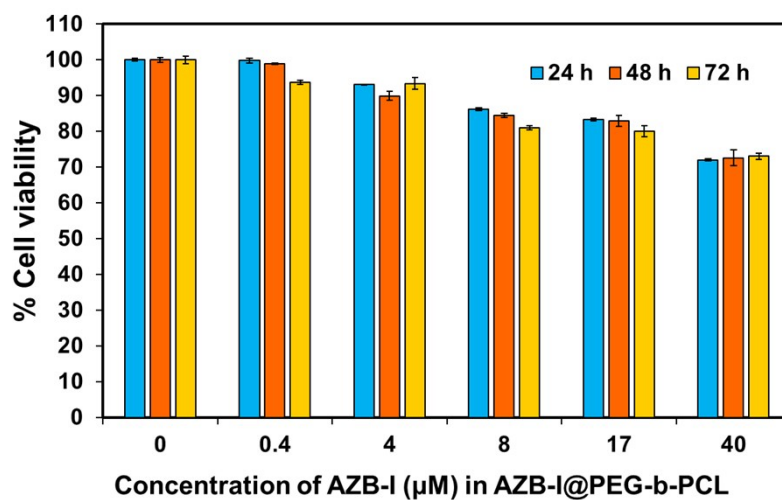

**Figure S14.** Relative cell viability of HEK-293 cells after treated various concentration of **AZB-I** within **AZB-I@PEG-*b*-PCL** NPs and the cells were kept in the dark for 24, 48 and 72 h (data are presented as means  $\pm$  SD (n = 3)).

10. Mice body weight changes of **AZB-I@PEG-*b*-PCL** at 160 mg/kg

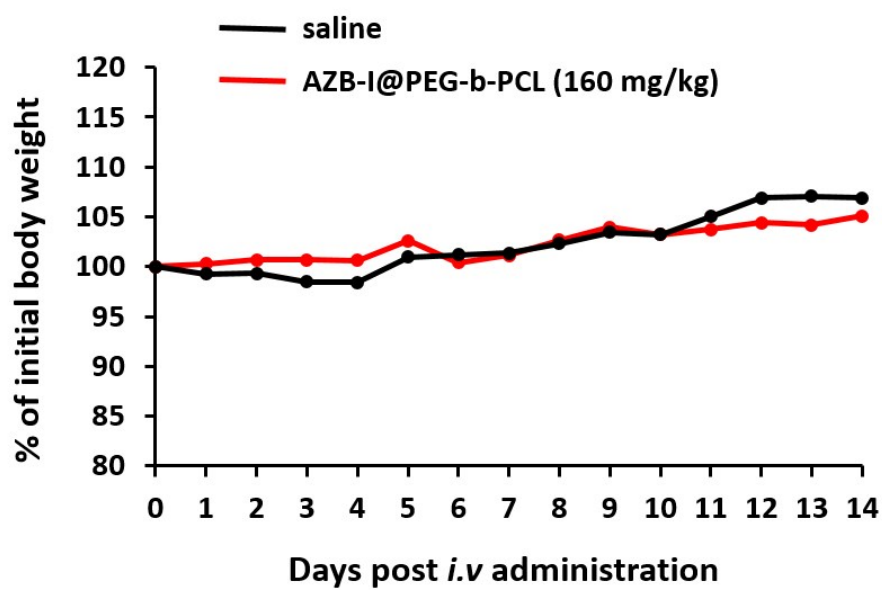

**Figure S15.** Mice body weight changes of **AZB-I@PEG-*b*-PCL** at 160 mg/kg (red) and control saline (black) post single i.v administration.

**Table S2.** The formulations and the obtained DLS sizes of **AZB-I@PEG-*b*-PCL** compared with those of other aza-BODIPY-based nanoparticles

| Entry | Structure | Polymer used       | $\lambda_{\text{Abs}} / \lambda_{\text{Emiss}}$ (nm) | Homogenization     | Average DLS size (nm)       | Reference |
|-------|-----------|--------------------|------------------------------------------------------|--------------------|-----------------------------|-----------|
| 1     |           | PEG- <i>b</i> -PLA | 860 / 925                                            | Sonication (180 W) | 138.4±17.3                  | [1]       |
| 2     |           | PEG                | 652 / 730                                            | Sonication (200 W) | 81.7 ± 7.5                  | [2]       |
| 3     |           | PEG                | 690 / 775                                            | Sonication (180 W) | 68.1 ± 9.7                  | [3]       |
| 4     |           | DSPE-mPEG 5000     | 678 / 712                                            | Sonication (220 W) | 142                         | [4]       |
| 5     |           | DSPE-mPEG 5000     | 580 / 720                                            | Sonication (175 W) | 66.3 ± 6.6                  | [5]       |
| 6     |           | PEG- <i>b</i> -PCL | 693/ 730                                             | Stirring           | 44.6 (± 4.0) – 48.2 (± 1.9) | This work |

\* PEG-co-PLA = polyethylene glycol-*b*- polylactic acid, PEG = polyethylene glycol, DSPE-mPEG5000 = 1,2-distearoyl-sn-glycero-3-phospho ethanolamine-N-[methoxy(polyethylene glycol)-5000]

## References

- [1] Tian J, Zhou J, Shen Z, Ding L, Yu J-S, Ju H. A pH-activatable and aniline-substituted photosensitizer for near-infrared cancer theranostics. *Chemical Science*. 2015;6(10):5969-77.
- [2] Chen D, Tang Q, Zou J, Yang X, Huang W, Zhang Q, et al. pH-Responsive PEG–Doxorubicin-Encapsulated Aza-BODIPY Nanotheranostic Agent for Imaging-Guided Synergistic Cancer Therapy. *Advanced Healthcare Materials*. 2018;7(7):1701272.
- [3] Chen D, Zhang J, Tang Y, Huang X, Shao J, Si W, et al. A tumor-mitochondria dual targeted aza-BODIPY-based nanotheranostic agent for multimodal imaging-guided phototherapy. *Journal of Materials Chemistry B*. 2018;6(27):4522-30.
- [4] Zhao M, Xu Y, Xie M, Zou L, Wang Z, Liu S, et al. Halogenated Aza-BODIPY for Imaging-Guided Synergistic Photodynamic and Photothermal Tumor Therapy. *Advanced Healthcare Materials*. 2018;7(18):1800606.
- [5] Xiao W, Wang P, Ou C, Huang X, Tang Y, Wu M, et al. 2-Pyridone-functionalized Aza-BODIPY photosensitizer for imaging-guided sustainable phototherapy. *Biomaterials*. 2018;183:1-9.
